# Supplementary material
Source: PubMed Central journal article supplement (PMC4972268)
Supplement: supp_pp.16.00342_PP2016-00342R2_Supplemental_Table_S1.pdf [file supp_pp.16.00342_PP2016-00342R2_Supplemental_Table_S1.pdf]

**Supplemental Table S1.** Primers used in this study.

| Oligo Name                                | DNA Sequence                                                                                                                   |
|-------------------------------------------|--------------------------------------------------------------------------------------------------------------------------------|
| For site-directed mutagenesis             |                                                                                                                                |
| Y268V-AsphyA                              | 5'-CCTTATCTAGGCTTGCACGTTCCAGCCACTG-3' (Forward)<br>5'-CAGTGGCTGGAACGTGCAAGCCTAGATAAGG-3' (Reverse)                             |
| Y268F-AsphyA                              | 5'-CCTTATCTAGGCCTGCACTTTCCAGCCACTGATATCCCT-3' (Forward)<br>5'-AGGGATATCAGTGGCTGGAAAGTGCAGGCCTAGATAAGG-3' (Reverse)             |
| Y303V-AtphyB                              | 5'-CCTTATATTGGACTGCATGTTCTGCTACTGATATTCCTC-3' (Forward)<br>5'-GAGGAATATCAGTAGCAGGAACATGCAGTCCAATATAAGG-3' (Reverse)            |
| Y276H-AtphyB                              | 5'-GGTTATGATCGTGTATGGTTCATAAGTTTCATGAAGATG-3' (Forward)<br>5'-GCTCATCTTCATGAACTTATGAACCATAACACGATCATAACC-3' (Reverse)          |
| Y269A-AtphyA                              | 5'-CTTGGGCTGCATGTTCTGCCACCGAC-3' (Forward)<br>5'-GTCGGTGGCAGGAACATGCAGCCCAAG-3' (Reverse)                                      |
| Y326V-AsphyA                              | 5'-CAGTTGTCAACCTGCAGGTTATGGAGAACATG-3' (Forward)<br>5'-CATGTTCTCCATAACCTGCAGGTTGACAACCTG-3' (Reverse)                          |
| Y326F-AsphyA                              | 5'-CAGTTGTCACCTGCAGTTTATGGAGAACATG-3' (Forward)<br>5'-CATGTTCTCCATAACCTGCAGGTTGACAACCTG-3' (Reverse)                           |
| For the cloning into pBI121-eGFP vector   |                                                                                                                                |
| Y268V-AsphyA                              | 5'-GCGTCGACATGTCTTCTCAAGGCCTGCTTCC ( <i>Sall</i> , Forward)<br>5'-GGGGATTCCTGTCCCATTGCTGTTGGAGCGG ( <i>Bam</i> HI, Reverse)    |
| Y303V-AtphyB                              | 5'-GCTCTAGAATGGTTTTCCGGAGTC ( <i>Xba</i> I, Forward)<br>5'-GGGGTACCATATGGCATCATCAGCATCATGTCAC ( <i>Kpn</i> I, Reverse)         |
| Y269V-AtphyA                              | 5'-GCGTCGACATGTCAGGCTCTAGGCCGACTCAG ( <i>Sall</i> , Forward)<br>5'-CGGGATCCCTTGTGTTGCTGCAGCGAGTTCCGC ( <i>Bam</i> HI, Reverse) |
| For the NLS- or NES-fused constructs      |                                                                                                                                |
| CsVMVpro                                  | 5'-CCC <u>AAGCTT</u> ATCCATTCCAGAAGGTAATTATCCAAG-3' ( <i>Hind</i> III, Forward)                                                |
| NLS-1st                                   | 5'-CTTTCTCTTCTTCTTAGGCTGCAGCTTGTACAGCTCGTCCATGCCGAGAGTG-3' (Reverse)                                                           |
| NLS-2nd                                   | 5'-CGAGCTCCTATCCTCCAACCTTCTCTTCTTCTTAGGCTGCAG-3' ( <i>Sac</i> I, Reverse)                                                      |
| NES-1st                                   | 5'-CAGCCAACTTAAGAGCAAGCTCGTTCTGCAGCTTGTACAGCTCGTCCATGCCGA GAGTGATC-3' (Reverse)                                                |
| NES-2nd                                   | 5'-CGAGCTCCTATCCTCCAGTCTTGTTAATATCAAGTCCAGCCAACTTAAGAGCAA GCTCGTTCTGCAG-3' ( <i>Sac</i> I, Reverse)                            |
| For the site-directed mutagenesis of Cph1 |                                                                                                                                |
| Y176H-Cph1                                | 5'-GACCGGGTGATGCTAGTCCGCTTTGATGAAAATAAC-3' (Forward)<br>5'-GTTATTTTCATCAAAGCGGACTAGCATCACCCGGTC-3' (Reverse)                   |
| Y203V-                                    | 5'-CTATTTGGGCCTGCACGTTCCCGAATCGGATATTC-3' (Forward)                                                                            |

|                |                                                                                                           |
|----------------|-----------------------------------------------------------------------------------------------------------|
| Cph1           | 5'-GAATATCCGATTCGGGAACGTGCAGGCCCAAATAG-3' (Reverse)                                                       |
| Y203H-<br>Chp1 | 5'-CTATTGGGCCTGCACCATCCCGAATCGGATATTC-3' (Forward)<br>5'-GAATATCCGATTCGGGATGGTGCAGGCCCAAATAG-3' (Reverse) |
